# Supplementary material for: Frailty as a Marker for the Plasma Concentrations of Direct Oral Anticoagulants in Older Patients: Results of an Exploratory Study
Source: Springer Nature journal article supplement (doi:10.1007/s40266-022-00999-y), 2023-01-13
Supplement: MOESM1 [file 23920452]

## **Electronic Supplementary Material**

### **Drugs & Aging**

#### **Frailty as a marker for the plasma concentrations of direct oral anticoagulants in older patients – Results of an exploratory study**

Annette Eidam<sup>1</sup>, Julian Marji<sup>1</sup>, Petra Benzinger<sup>1</sup>, Kathrin I. Foerster<sup>2</sup>, Jürgen Burhenne<sup>2</sup>, David Czock<sup>2</sup>, Felicitas Stoll<sup>2</sup>, Antje Blank<sup>2</sup>, Gerd Mikus<sup>2</sup>, Walter E. Haefeli<sup>2</sup>, Jürgen M. Bauer<sup>1,3</sup>

<sup>1</sup>Center for Geriatric Medicine, Heidelberg University, AGAPLESION Bethanien Hospital  
Heidelberg, Rohrbacher Straße 149, 69126 Heidelberg, Germany

<sup>2</sup>Department of Clinical Pharmacology and Pharmacoepidemiology, Heidelberg University, Im  
Neuenheimer Feld 410, 69120 Heidelberg, Germany

<sup>3</sup>Network Aging Research (NAR), Heidelberg University, Bergheimer Straße 20, 69115  
Heidelberg, Germany

#### **Correspondence:**

Dr. med. Annette Eidam

Center for Geriatric Medicine, Heidelberg University, AGAPLESION Bethanien Hospital  
Heidelberg, Rohrbacher Straße 149, 69126 Heidelberg, Germany

Tel: +49 (0) 6221-319-1795

Fax: +49 (0) 6221-319-1505

Email: Annette.Eidam@apaplesion.de

**Table S1 Characteristics of rivaroxaban study patients**

| Characteristic                                                     | Rivaroxaban (n = 14)           |
|--------------------------------------------------------------------|--------------------------------|
| Age, years: Mean ( $\pm$ SD; range)                                | 84.4 ( $\pm$ 7.3; 70-95)       |
| Female, n (%)                                                      | 7 (50)                         |
| Creatinine clearance (CG), ml/min: Mean ( $\pm$ SD; range)         | 56.6 ( $\pm$ 17.1; 19.5-86.0)  |
| Weight, kg: Mean ( $\pm$ SD; range)                                | 81.6 ( $\pm$ 18.6; 47.0-120.2) |
| Indication for DOAC, n (%)                                         |                                |
| Atrial fibrillation (nonvalvular)                                  | 7 (50.0)                       |
| Atrial fibrillation + treatment of PE                              | 0 (0)                          |
| Atrial fibrillation + NSTEMI                                       | 1 (7.1)                        |
| Prophylaxis of recurrent DVT/PE                                    | 4 (28.6)                       |
| Peripheral artery disease                                          | 1 (7.1)                        |
| Ambiguous                                                          | 1 (7.1)                        |
| Dose in mg, n (%)                                                  |                                |
| 20 QD                                                              | 3 (21.4)                       |
| 15 QD                                                              | 8 (57.1)                       |
| 10 QD                                                              | 1 (7.1)                        |
| 2.5 BID                                                            | 2 (14.3)                       |
| Fried category, n (%)                                              |                                |
| Robust                                                             | 0 (0)                          |
| Pre-frail                                                          | 8 (57.1)                       |
| Frail                                                              | 6 (42.9)                       |
| Number of Fried criteria met, n (%)                                |                                |
| 0                                                                  | 0 (0)                          |
| 1                                                                  | 2 (14.3)                       |
| 2                                                                  | 6 (42.9)                       |
| 3                                                                  | 4 (28.6)                       |
| 4                                                                  | 2 (14.3)                       |
| 5                                                                  | 0 (0)                          |
| Short Physical Performance Battery score, n (%)                    |                                |
| 10-12                                                              | 2 (14.3)                       |
| 8-9                                                                | 1 (7.1)                        |
| 0-7                                                                | 11 (78.6)                      |
| FRAIL scale score, n (%)                                           |                                |
| 0                                                                  | 2 (14.3)                       |
| 1-2                                                                | 5 (35.7)                       |
| $\geq$ 3                                                           | 7 (50.0)                       |
| Frailty index: Mean ( $\pm$ SD; range)                             | 0.43 ( $\pm$ 0.15; 0.18-0.71)  |
| Number of Fried criteria "gait speed" + "grip strength" met, n (%) |                                |
| 0                                                                  | 0 (0)                          |
| 1                                                                  | 3 (21.4)                       |
| 2                                                                  | 11 (78.6)                      |
| Gait speed, m/s: Mean ( $\pm$ SD; range)                           | 0.65 ( $\pm$ 0.21; 0.35-1.14)  |
| Grip strength (female), kg: Mean ( $\pm$ SD; range)                | 14.5 ( $\pm$ 4.4; 7.3-20.3)    |
| Grip strength (male), kg: Mean ( $\pm$ SD; range)                  | 24.5 ( $\pm$ 5.1; 16.7-29.7)   |

BID, twice a day; CG, Cockcroft and Gault formula; DVT, deep vein thrombosis; NSTEMI, non-ST elevation myocardial infarction; PE, pulmonary embolism; QD, once a day; SD, standard deviation

**Table S2 Spearman correlation of dose-normalized rivaroxaban trough concentrations with patient characteristics, frailty assessments, and functional parameters**

| Characteristic                                              | Rivaroxaban trough<br>(n = 14)<br>$r_s$ (p-value) | Rivaroxaban trough in QD dosed participants<br>(n = 12)<br>$r_s$ (p-value) |
|-------------------------------------------------------------|---------------------------------------------------|----------------------------------------------------------------------------|
| Age                                                         | 0.406 (0.150)                                     | 0.587 (0.045)                                                              |
| Creatinine clearance (Cockcroft and Gault formula)          | -0.433 (0.122)                                    | -0.469 (0.124)                                                             |
| Weight                                                      | 0.053 (0.858)                                     | -0.032 (0.923)                                                             |
| Number of Fried criteria met                                | 0.032 (0.912)                                     | 0.074 (0.819)                                                              |
| Short Physical Performance Battery score                    | -0.050 (0.866)                                    | -0.036 (0.911)                                                             |
| FRAIL scale score                                           | -0.142 (0.628)                                    | -0.104 (0.747)                                                             |
| Frailty index                                               | -0.121 (0.680)                                    | -0.126 (0.697)                                                             |
| Number of Fried criteria "gait speed" + "grip strength" met | 0.065 (0.826)                                     | 0.194 (0.545)                                                              |
| Gait speed (fastest of two 15-foot walks)                   | -0.371 (0.191)                                    | -0.448 (0.145)                                                             |
| Gait speed (first of two 15-foot walks)                     | -0.442 (0.114)                                    | -0.517 (0.085)                                                             |
| Mean grip strength (female)                                 | 0.179 (0.702)                                     | 0.143 (0.787)                                                              |
| Mean grip strength (male)                                   | -0.054 (0.908)                                    | -0.314 (0.544)                                                             |
| Peak flow                                                   | -0.756 (0.002)                                    | -0.737 (0.006)                                                             |

QD, once a day

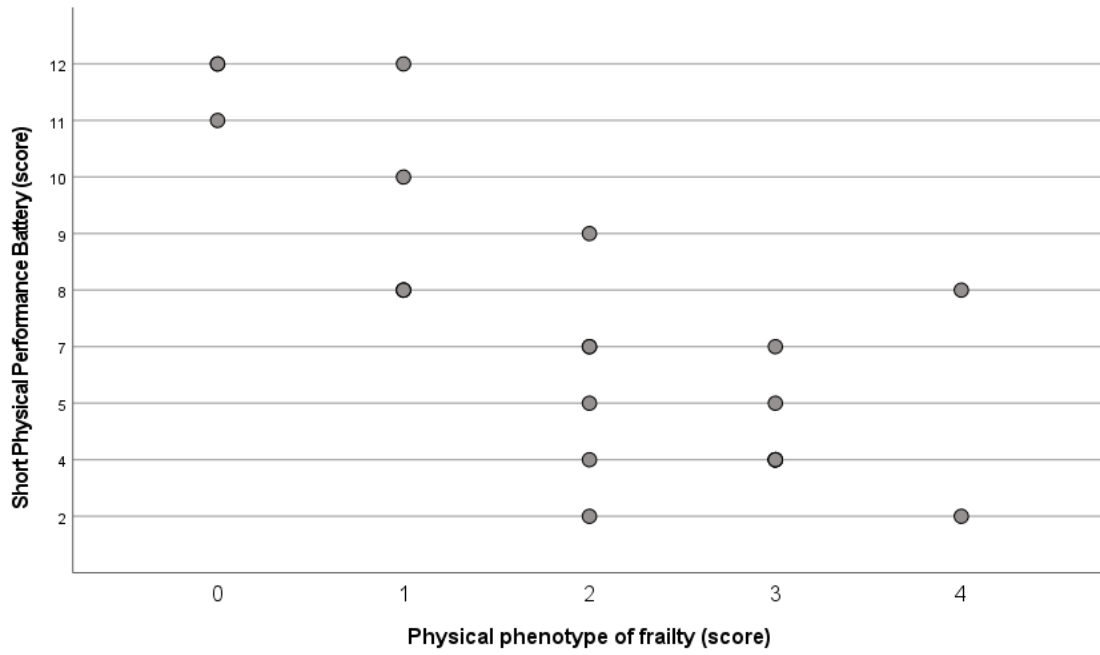

**Fig. S1** Relationship between the score on the physical phenotype of frailty [1] and the score on the Short Physical Performance Battery [2] in the apixaban subsample (n = 22)

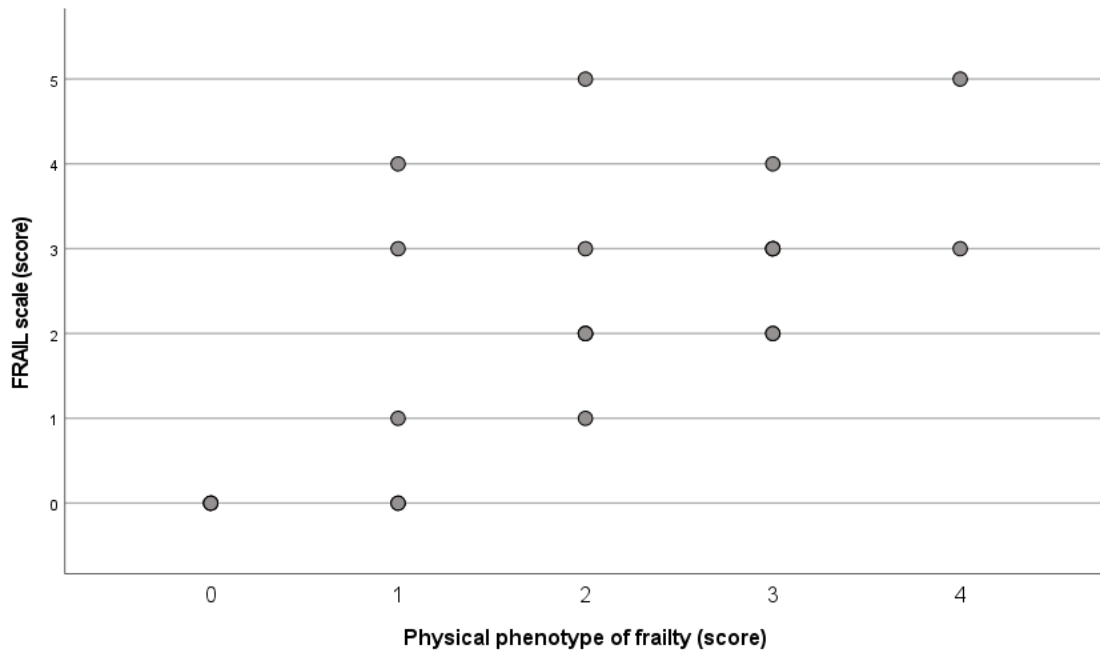

**Fig. S2** Relationship between the score on the physical phenotype of frailty [1] and the score on the FRAIL scale [3] in the apixaban subsample (n = 22)

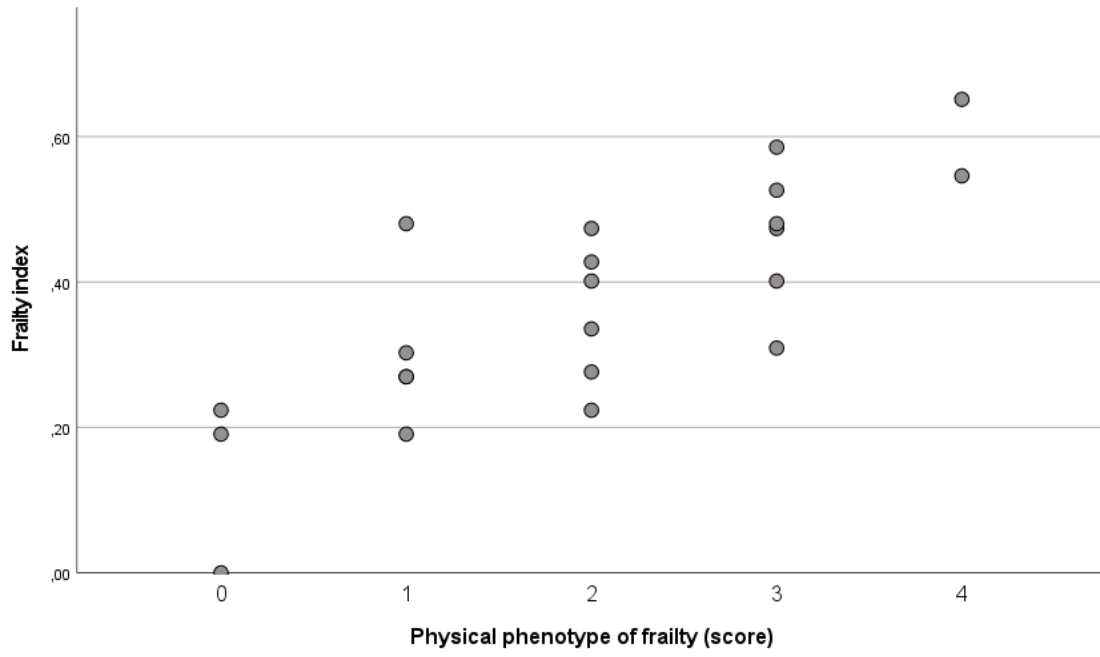

**Fig. S3** Relationship between the score on the physical phenotype of frailty [1] and the frailty index [4] in the apixaban subsample (n = 22)

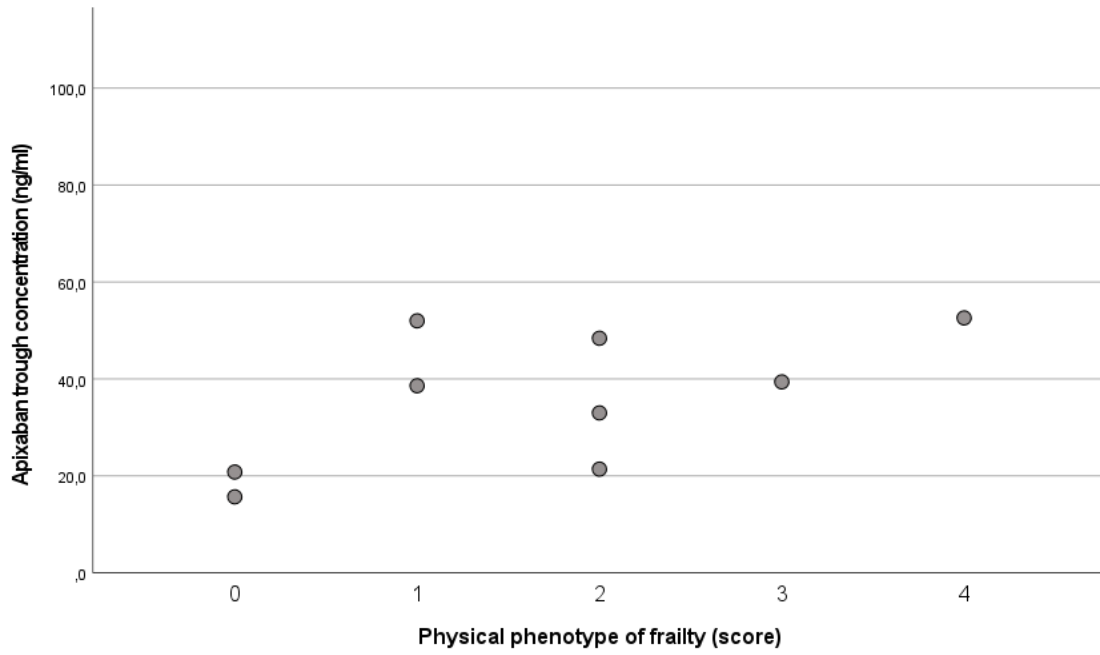

**Fig. S4** Relationship between apixaban trough concentrations (dose-normalized) and score on the physical phenotype of frailty [1] in the 5 mg BID subgroup (n = 9)

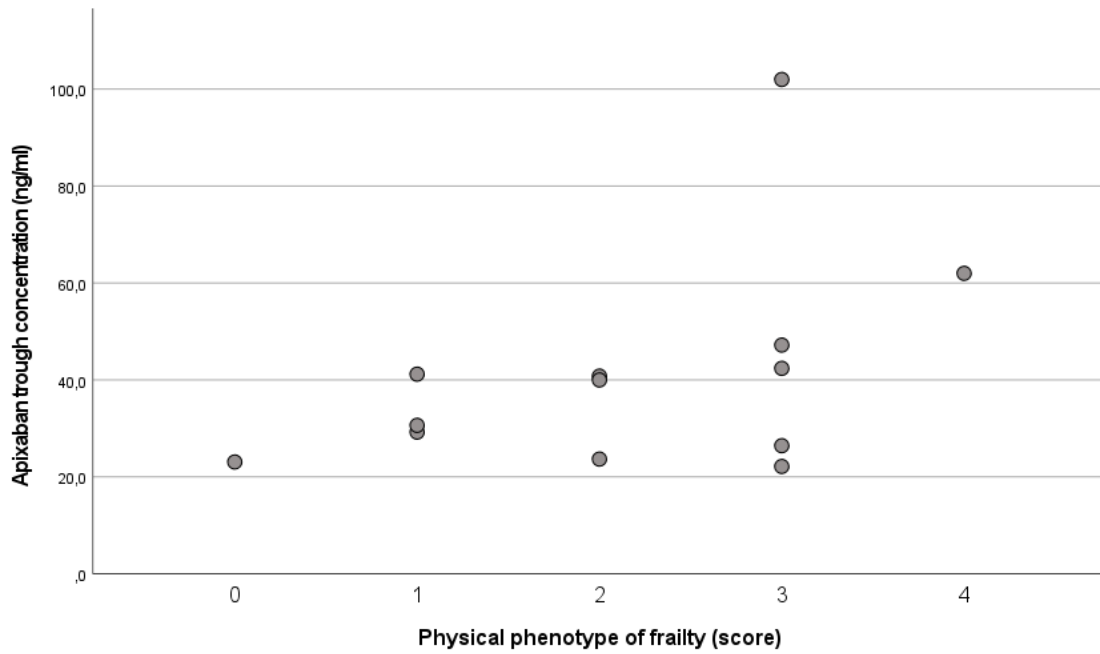

**Fig. S5** Relationship between apixaban trough concentrations (dose-normalized) and score on the physical phenotype of frailty [1] in the 2.5 mg BID subgroup (n = 13)

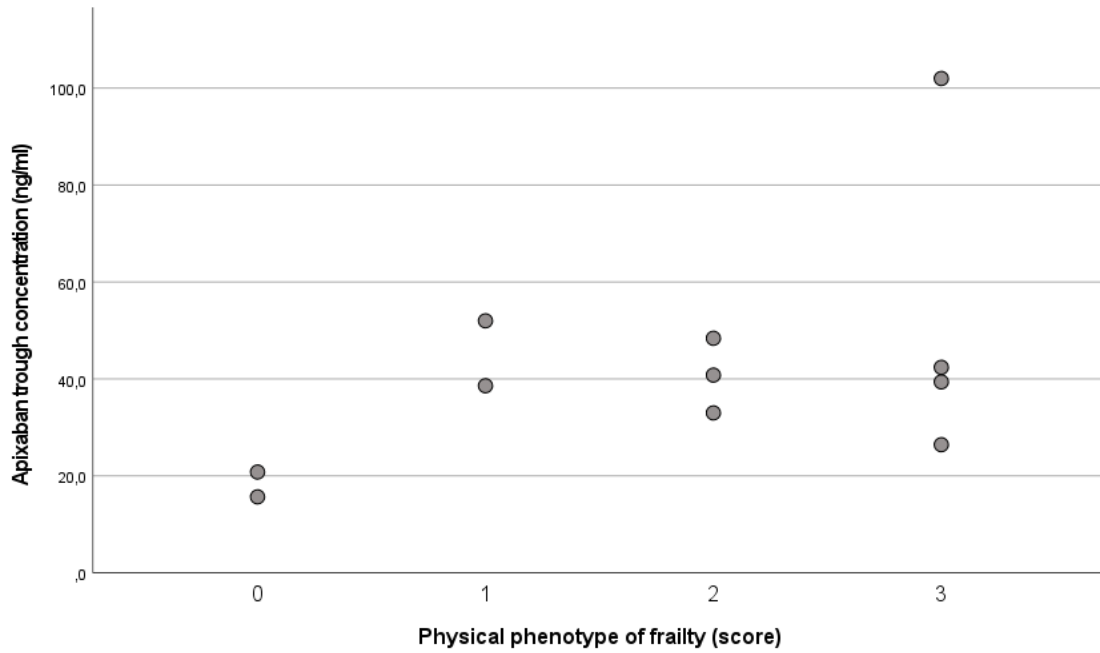

**Fig. S6** Relationship between apixaban trough concentrations (dose-normalized) and score on the physical phenotype of frailty [1] in participants who are accurately dosed according to the dosing recommendations for anticoagulation therapy in atrial fibrillation [5] (n = 11)

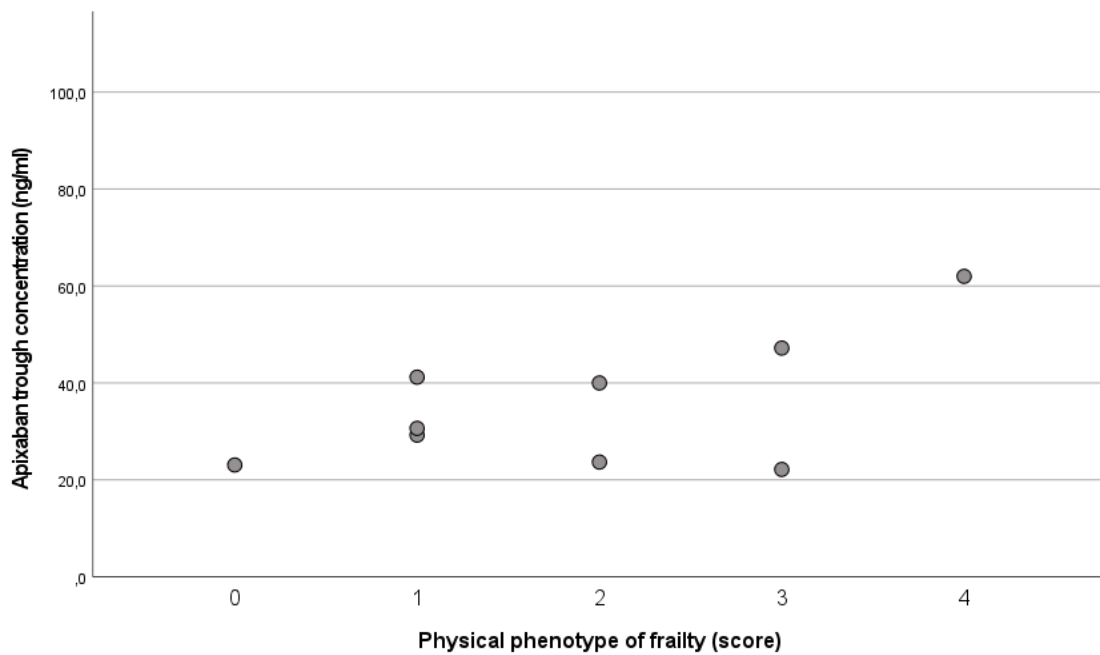

**Fig. S7** Relationship between apixaban trough concentrations (dose-normalized) and score on the physical phenotype of frailty [1] in participants who are inaccurately dosed with 2.5 mg BID according to the dosing recommendations for anticoagulation therapy in atrial fibrillation [5] (n = 9)

**Table S3 Frailty status of the participants in the different apixaban dosage groups**

| Frailty status | 5 mg BID<br>Accurate dose<br>(n = 7) | 2,5 mg BID<br>Accurate dose<br>(n = 4) | 2,5 mg BID<br>Inaccurate dose<br>(n = 9) | 5 mg BID<br>Inaccurate dose<br>(n = 2) |
|----------------|--------------------------------------|----------------------------------------|------------------------------------------|----------------------------------------|
| Robust         | 2                                    | -                                      | 1                                        | -                                      |
| Pre-frail      | 4                                    | 1                                      | 5                                        | 1                                      |
| Frail          | 1                                    | 3                                      | 3                                        | 1                                      |

BID, twice daily;

Accurate dose = Accurate dose according to the recommendations for the dosing in atrial fibrillation [5];

Inaccurate dose = Inaccurate dose according to the recommendations for the dosing in atrial fibrillation [5];

**Table S4 Number of frailty criteria (weak grip strength, slow gait speed) met in the different apixaban dosage groups**

| Grip strength + gait speed (number of criteria met) | 5 mg BID<br>Accurate dose<br>(n = 7) | 2,5 mg BID<br>Accurate dose<br>(n = 4) | 2,5 mg BID<br>Inaccurate dose<br>(n = 9) | 5 mg BID<br>Inaccurate dose<br>(n = 2) |
|-----------------------------------------------------|--------------------------------------|----------------------------------------|------------------------------------------|----------------------------------------|
| 0                                                   | 2                                    | -                                      | 3                                        | 1                                      |
| 1                                                   | 3                                    | -                                      | 2                                        | -                                      |
| 2                                                   | 2                                    | 4                                      | 4                                        | 1                                      |

BID, twice daily;

Accurate dose = Accurate dose according to the recommendations for the dosing in atrial fibrillation [5];

Inaccurate dose = Inaccurate dose according to the recommendations for the dosing in atrial fibrillation [5];

**Table S5 Mean and median non-dose-normalized apixaban trough concentrations relative to the different frailty categories**

| Frailty category                                            | Non-dose-normalized apixaban trough concentration (ng/ml)<br>Mean ( $\pm$ SD) | Non-dose-normalized apixaban trough concentration (ng/ml)<br>Median (range) |
|-------------------------------------------------------------|-------------------------------------------------------------------------------|-----------------------------------------------------------------------------|
| Category according to the physical phenotype of frailty     |                                                                               |                                                                             |
| Robust (n = 3)                                              | 80.0 ( $\pm$ 23.2)                                                            | 78.4 (57.7-104.0)                                                           |
| Pre-frail (n = 11)                                          | 134.6 ( $\pm$ 69.6)                                                           | 103.0 (59.2-260.0)                                                          |
| Frail (n = 8)                                               | 151.9 ( $\pm$ 80.1)                                                           | 136.5 (55.4-263.0)                                                          |
| Number of Fried criteria "gait speed" + "grip strength" met |                                                                               |                                                                             |
| 0 (n = 6)                                                   | 82.8 ( $\pm$ 19.1)                                                            | 77.5 (57.7-107.0)                                                           |
| 1 (n = 5)                                                   | 179.6 ( $\pm$ 75.4)                                                           | 193.0 (100.0-260.0)                                                         |
| 2 (n = 11)                                                  | 140.2 ( $\pm$ 73.9)                                                           | 118.0 (55.4-263.0)                                                          |

SD, standard deviation



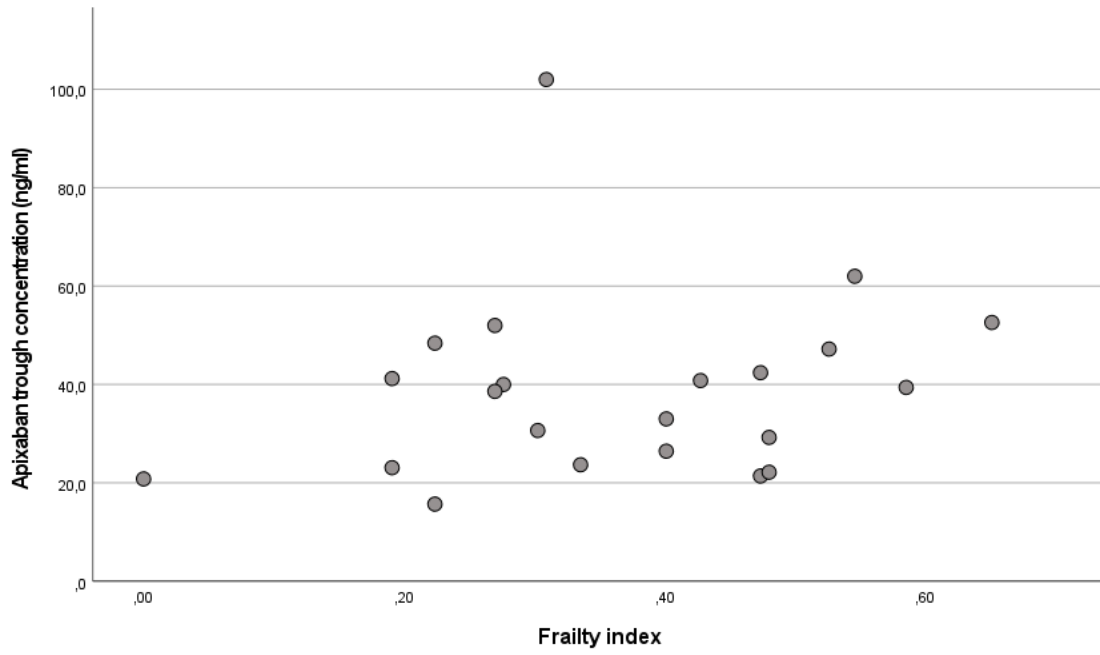

Fig. S8 Dose-normalized apixaban trough concentrations relevant to the frailty index

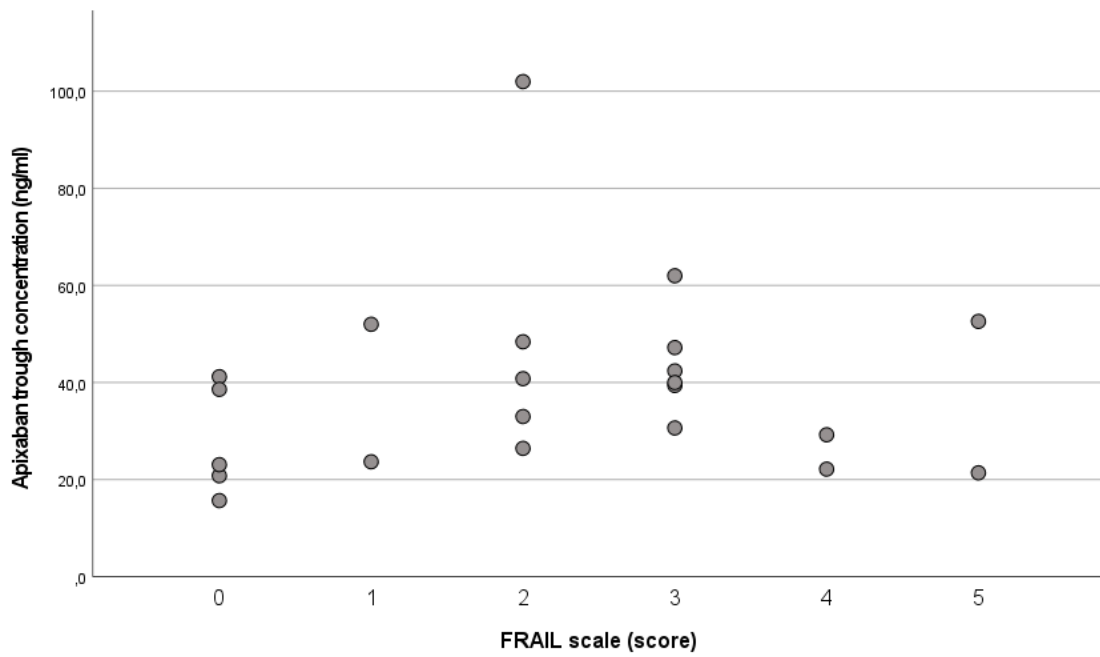

Fig. S9 Dose-normalized apixaban trough concentrations relevant to the score on the FRAIL scale

## References

1. Fried LP, Tangen CM, Walston J, Newman AB, Hirsch C, Gottdiener J et al. Frailty in older adults: evidence for a phenotype. *J Gerontol A Biol Sci Med Sci*. 2001;56(3):M146-56. doi:10.1093/gerona/56.3.m146.
2. Guralnik JM, Simonsick EM, Ferrucci L, Glynn RJ, Berkman LF, Blazer DG et al. A short physical performance battery assessing lower extremity function: association with self-reported disability and prediction of mortality and nursing home admission. *J Gerontol*. 1994;49(2):M85-94. doi:10.1093/geronj/49.2.m85.
3. Morley JE, Malmstrom TK, Miller DK. A simple frailty questionnaire (FRAIL) predicts outcomes in middle aged African Americans. *J Nutr Health Aging*. 2012;16(7):601-8. doi:10.1007/s12603-012-0084-2.
4. Searle SD, Mitnitski A, Gahbauer EA, Gill TM, Rockwood K. A standard procedure for creating a frailty index. *BMC Geriatr*. 2008;8:24. doi:10.1186/1471-2318-8-24.
5. European Medicines Agency. Eliquis - Summary of product characteristics. [https://www.ema.europa.eu/en/documents/product-information/eliquis-epar-product-information\\_en.pdf](https://www.ema.europa.eu/en/documents/product-information/eliquis-epar-product-information_en.pdf). Accessed 5 Jul 2021.
